# Supplementary material
Source: Springer Nature journal article supplement (https://www.springermedizin.de/resource/supplementary/12881_2013_1134_MOESM4_ESM.docx/9451784)
Supplement: MOESM4 [file 9451784]

| **Gene** | **IVS** | **Mutation** | **Frequency in the ESP database (Eur. Am.)** | **Mini-gene assay** | **Described in the literature** | **Classification** |
| --- | --- | --- | --- | --- | --- | --- |
| *MLH1* | 1 | c.117-34A>T | NI | No effect on splicing | Novel | Neutral |
|  | 7 | c.588+5G>A | NI | Out-of-frame skipping of exon 7 | Pagenstecher;  partial deletion of exon 7 [17](#_ENREF_1)  Tournier;  deletion of exon 7 and exons 7-8 15 | Pathogenic |
| 8 | c.677+3A>T | NI | Out-of-frame skipping of exon 8 | Novel | Pathogenic |
| 11 | c.1039-8T>A | NI | No effect on splicing | Betz; No effect on splicing 16 | Neutral |
| 15 | c.1732-2A>T | NI | In-frame skipping of exon 16 | Jäger* 5  Nilbert* 7  Wijnen* 20 | Pathogenic |
| *MSH2* | 7 | c.1276+1G>T | NI | In-frame exclusion of 48 bp of exon 7 | Mangold* 21 | Pathogenic |
| 10 | c.1662-2A>C | NI | Out-of-frame skipping of exon 11 | Novel | Pathogenic |
| 14 | c.2459-18delT | NI | No effect on splicing | Novel | Neutral |
| *MSH6* | 5 | c.3439-16C>T | 0.43% | No effect on splicing | Perez-Cabornero* 22  Pinto* 23  Sanchez de Abajo* 24 | Neutral |
|  |  |  |  |  |  |  |

Table 2 The effect on splicing determined by mini-gene assays and an overview of the mutations listed in the literature. *The authors describe the mutation of interest, but do not examine its putative pathogenic effect. IVS = intron; NI = not identified
